# Supplementary material for: Development of an efficient vector system for gene knock-out and near in-cis gene complementation in the sugarcane smut fungus
Source: PubMed Central journal article supplement (PMC5465213; doi:10.1038/s41598-017-03233-7), 2017-06-08
Supplement: 41598_2017_3233_MOESM1_ESM.pdf [file 41598_2017_3233_MOESM1_ESM.pdf]

## Supplementary Information

### Development of an efficient vector system for gene knock-out and near *in-cis* gene complementation in the sugarcane smut fungus

Shan Lu<sup>1,2</sup>, Xiaorui Shen<sup>2</sup>, Baoshan Chen<sup>1,2\*</sup>

<sup>1</sup>State Key Laboratory of Conservation and Utilization of Subtropical Agro-Bioresources, Nanning, 530004, China;

<sup>2</sup>College of Life Science and Technology, Guangxi University, Nanning, 530004, China

\*Corresponding author. chenyaoj@gxu.edu.cn

S1 Methods

S1 Figures

S1 Tables

## S1 Methods

### **Southern Blot**

The number of sites into which the *Cas9* gene was integrated in  $\Delta mfa2$  mutants was analyzed by Southern blotting using the DIG High Prime DNA Labeling and Detection Starter Kit II (Roche Applied Science, Indianapolis, IN). 40  $\mu\text{g}$  of genomic DNA of  $\Delta mfa2$  mutants were digested in *Hind*III and *Eco*RV digestion (ThermoFisher Scientific, USA) overnight at 37°C and then were electrophoresed in a 0.8% Tris-borate-EDTA (TBE) agarose gel at 100 V for 2 h. The gel was transferred onto a positively charged nylon membrane (GE, USA) overnight in 20 $\times$ SSC buffer (3 M NaCl, 0.35 M sodium citrate, pH7.0). The membrane was hybridized overnight at 42°C with 25ng/ml of a 766 bp DIG probe (Roche Applied Science, Indianapolis, IN) targeted to the *Cas9* gene. The hybridized probe was immunodetected with anti-digoxigenin-AP, Fab fragments were visualized with the chemiluminescence substrate CSPD according to the manufacturer's instructions. The membrane exposes to ImageQuant LAS 500 (GE, USA) for 10 min.

## S1 Figures

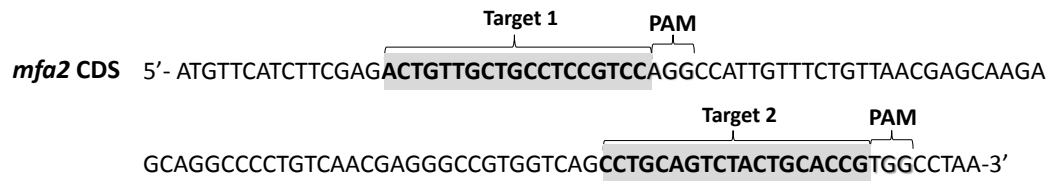

Figure S1. Target sequences of *Mfa2* gene.

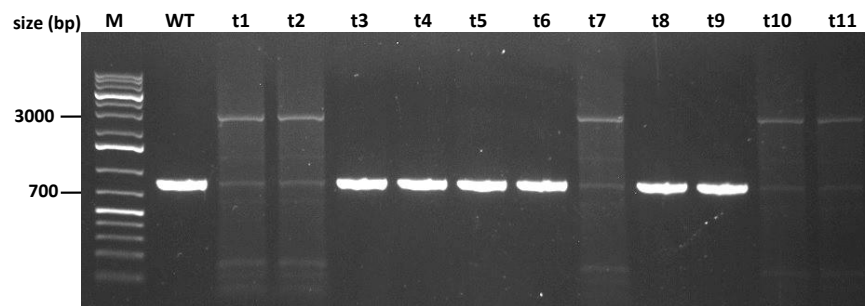

Figure S2. PCR amplification of the *Mfa2* locus of transformants. Primers used were *mfa2C1F/mfa2C1R*.

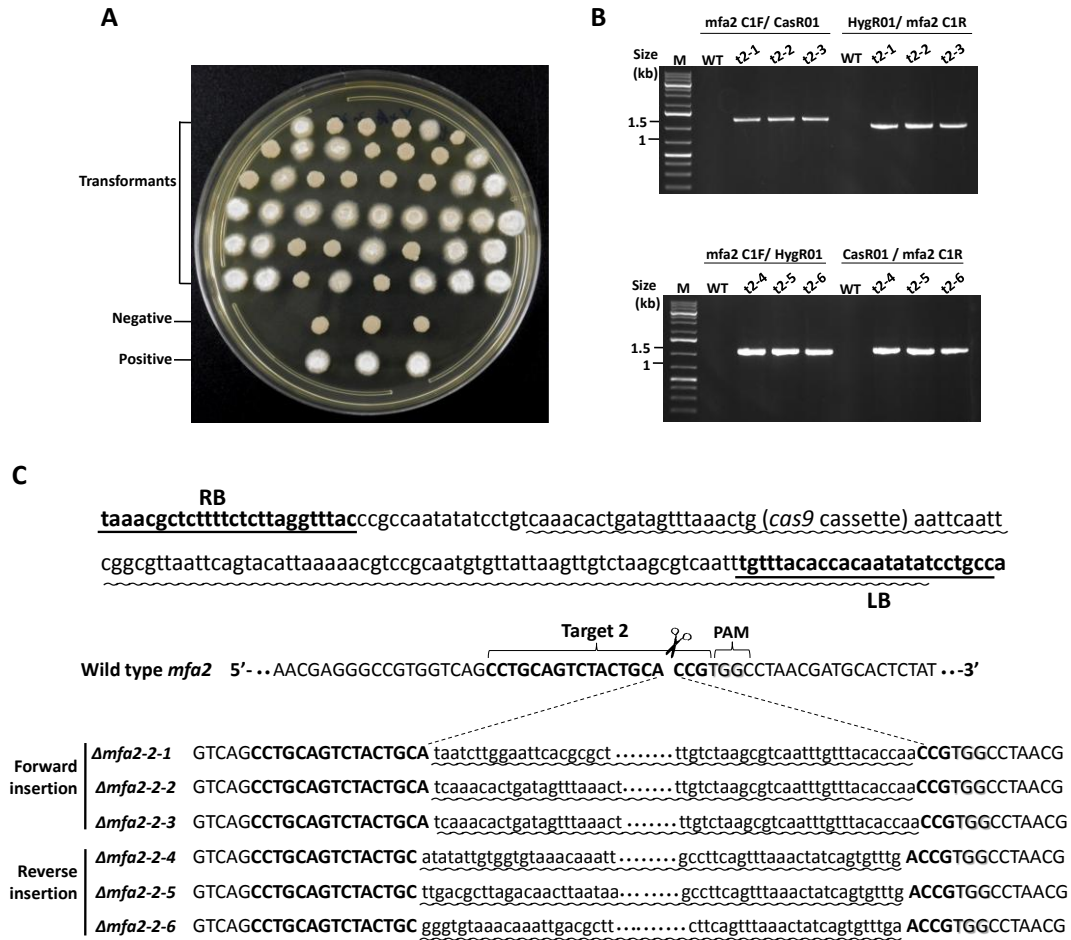

**Figure S3. Identification and characterization of *Mfa2* targeted mutants.** (A) Mating assays of transformants targeted at the target 2 region. The fluffy colonies are the result of successful mating, while dense colonies indicate a fail in mating. (B) PCR detection of the insert arms at the cleavage site. The left image was for the forward insertion and the right one for reverse insertion. For forward insertion, the sizes of PCR products were 1211 bp with primer pair *mfa2C1F/CasR01* and 1070 bp with primer pair *mfa2C1R/HygR01*. For reverse insertion, the sizes of PCR products were 1108 bp by primers *mfa2C1F/HygR01* and 1173 bp by primers *mfa2C1R/CasR01*. (C) Sequences of the *Mfa2* flanking the insert at target 2 locus of the transformants. Underlined are RB and LB regions. The insertion regions are marked with wavy line. As could be seen, in both forward or reverse insertions, the whole RB and a small portion of the cassette at the 5' end were lost, but only 7-12 LB nucleotides at the far most 3' end were lost.

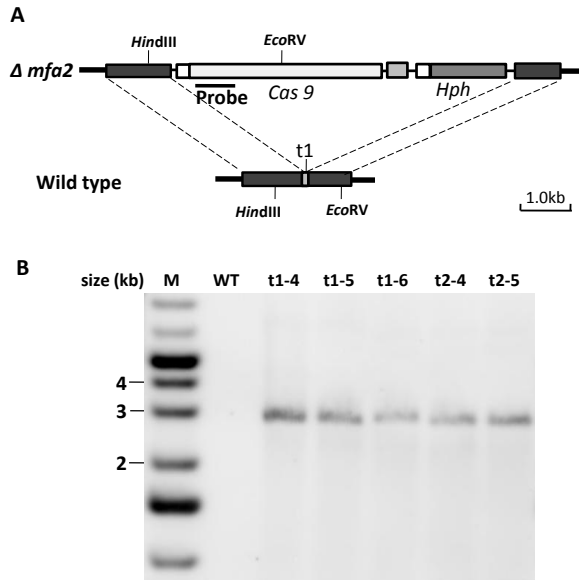

**Figure S4. Southern blot analysis of the  $\Delta mfa2$  mutants.** (A) Schematic representation of the location of the probe and the restriction enzymes used for DNA digestion. (B)  $\Delta mfa2$  mutants DNA were restricted with *HindIII* and *EcoRV* and separated in 0.8% agarose gel. After blotting, the nylon membrane was probed with labeled *Cas9* fragment. Wild-type JG35 was used as control.

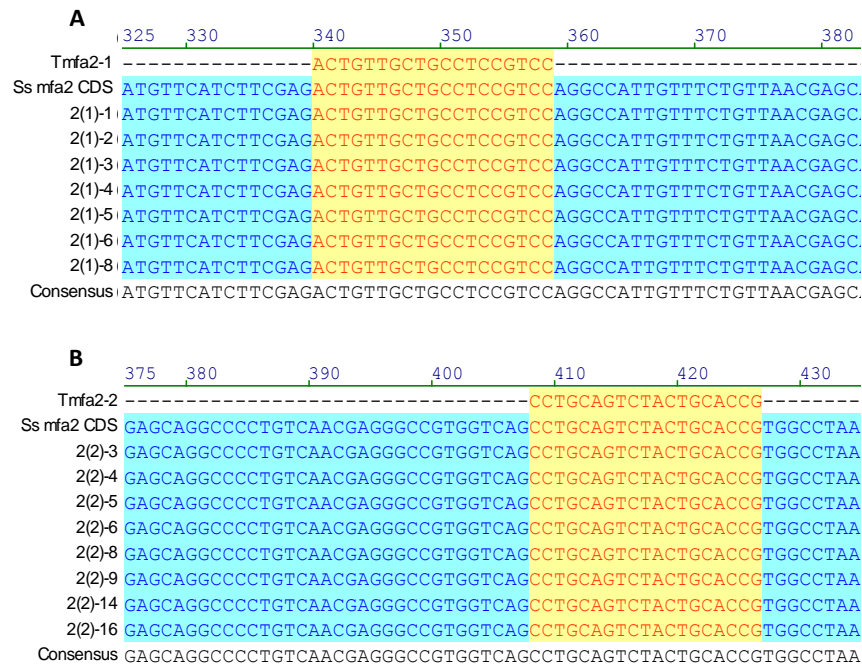

**Figure S5. Sequences at target site of pLS-Hcas9-Mfa2 transformants with normal mating capability.** (A) Target1. (B) Target2.

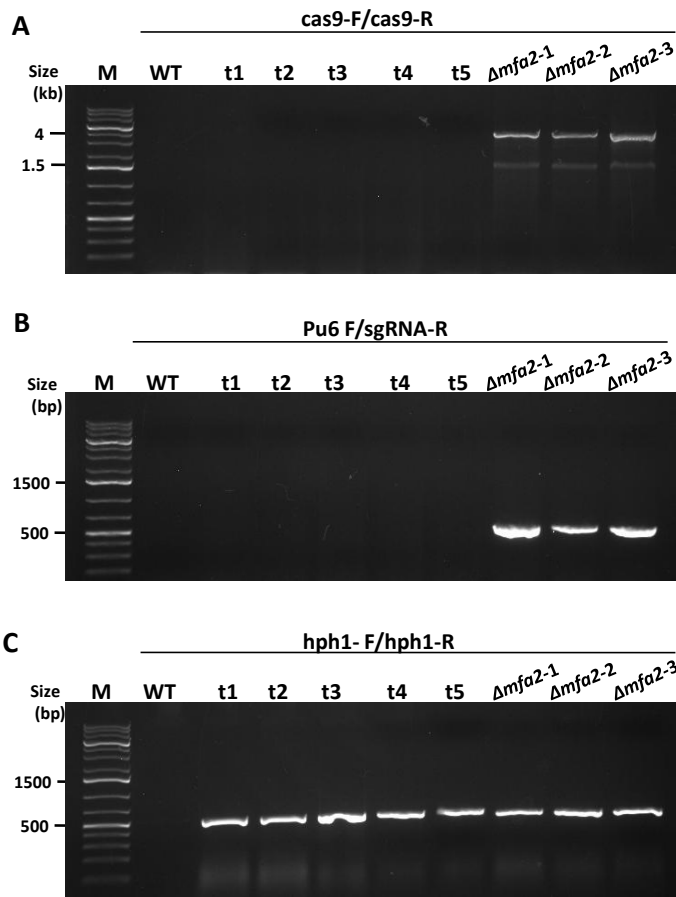

**Figure S6 PCR amplification of the components of the *cas9* cassette. (A) *Cas9* gene; (B) PU6-sgRNA; (C) *Hph* gene. The *cas9* cassettes of 5 off-target transformants with randomly integrated T-DNA delivered were not intact.**

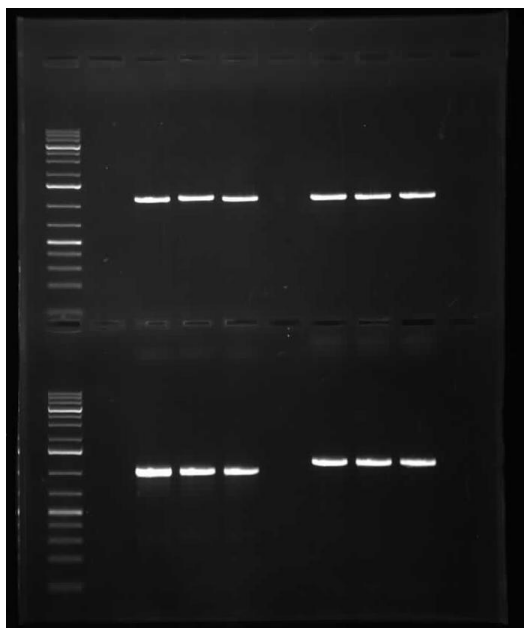

**Figure S7 The full-length gel of Figure 2B.**

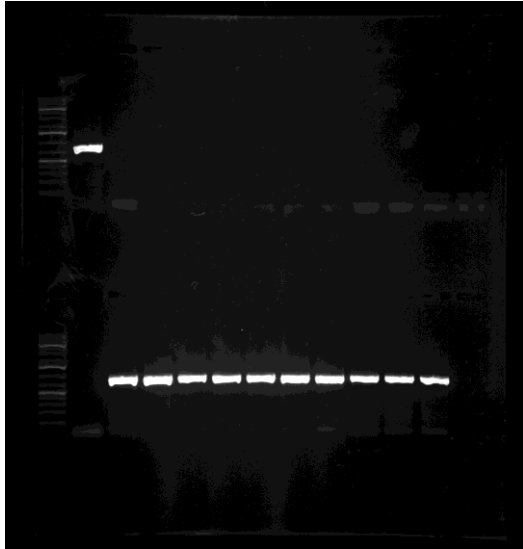

Figure S8 The full-length gel of Figure 3C (upper).

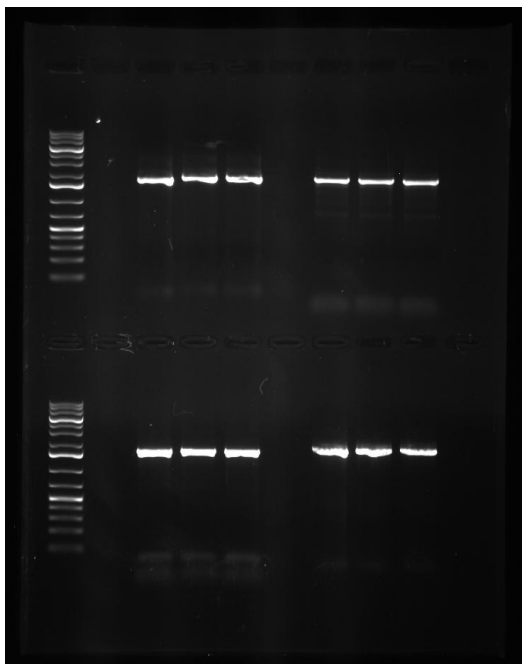

Figure S9 The full-length gel of Figure 3C (lower).

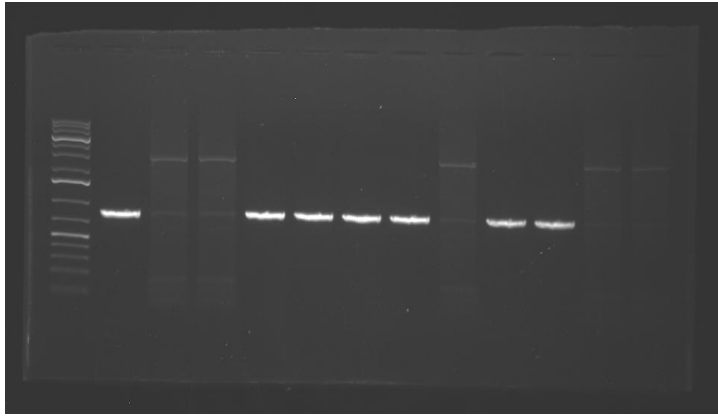

Figure S10 The full-length gel of Figure S2.

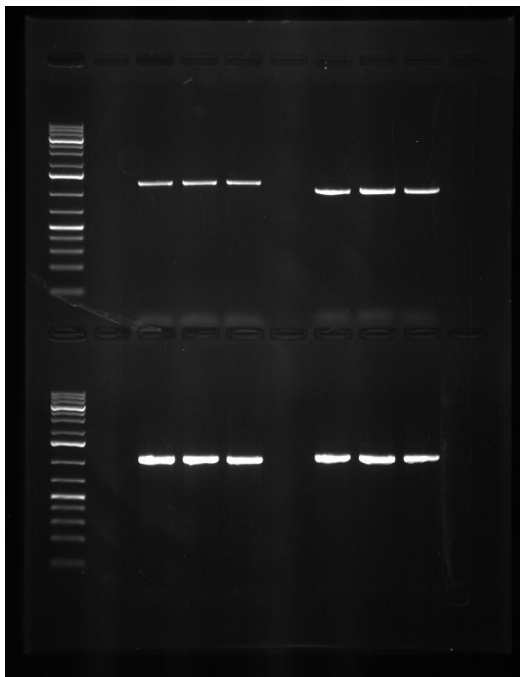

Figure S11 The full-length gel of Figure S3B.



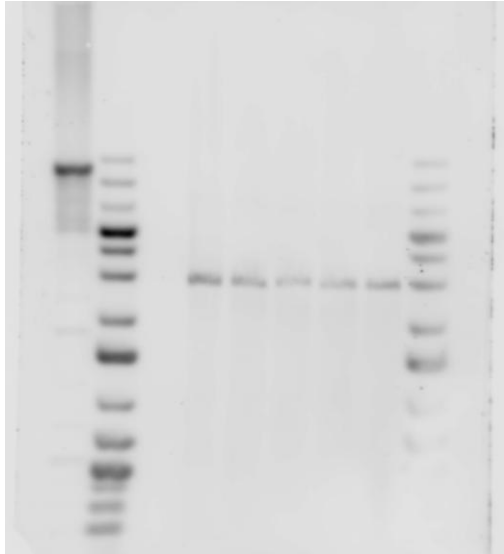

**Figure S12** The full-length blot of Figure S4. The first land from left was supercoiled plasmid of pLS-HCas9-Mfa2

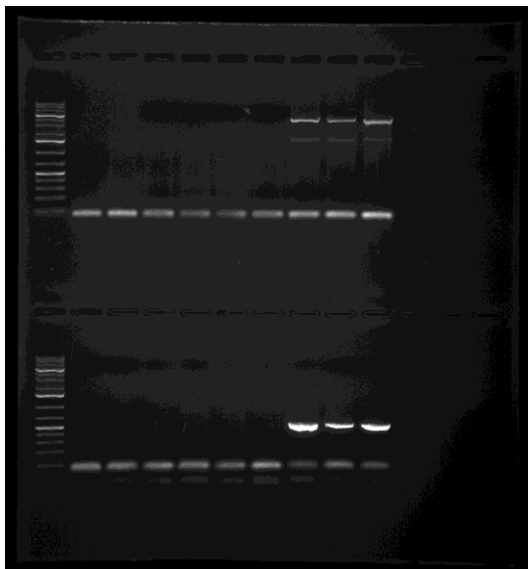

**Figure S13** The full-length gel of Figure S6A &S6B.

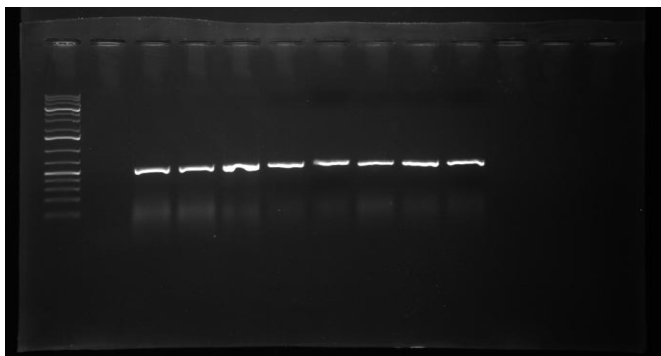

**Figure S14** The full-length gel of Figure S6C.

## S1 Tables

Table S1 Primers used in this work

| Primer       | Sequence                                               |
|--------------|--------------------------------------------------------|
| SsPu6F       | 5'-ATCGGCAGCAAAGGATACGATCGTCCCGACGATGCTC               |
| SsPu6R       | 5'-TCTTCAGAGGTCTCTCGAGGGTAAAATCTGATTGTATGAG            |
| U-F          | 5'-CTCCGTTTTACCTGTGGAATCG                              |
| gR-R         | 5'-CGGAGGAAAATTCCATCCAC                                |
| SsU6T mfa1①- | 5'-AGGCCGAGGTCTGGGCGGTGAGGGTAAAATCTGATTGTATG           |
| gRTmfa1①+    | 5'-ACCGCCCAGACCTCGGCCTGTTTTAGAGCTAGAAAT                |
| SsU6T mfa1②- | 5'-CTCTTGCGGCCCTCATCGGCGAGGGTAAAATCTGATTGTATG          |
| gRTmfa1②+    | 5'-CCGATGAGGGCCGCAAGAGTTTTAGAGCTAGAAAT                 |
| SsU6T mfa2①- | 5'-GGACGGAGGCAGCAACAGTCGAGGGTAAAATCTGATTGTATG          |
| gRTmfa2①+    | 5'-ACTGTTGCTGCCTCCGTCGGTTTTAGAGCTAGAAAT                |
| SsU6T mfa2②- | 5'-CGGTGCAGTAGACTGCAGGCGAGGGTAAAATCTGATTGTATG          |
| gRTmfa2②+    | 5'-CCTGCAGTCTACTGCACCGTTTTAGAGCTAGAAAT                 |
| U-Fs-BamHI   | 5'-CTATGTTACTAGAGGATCCCGGAATGATCTACAAAGCGTTCTTC        |
| gR-R-HindIII | 5'-TAACCATGGTACCAAGCTTATTCCATCCACTCCAAGCTCTTG          |
| Thph+        | 5'-ACCTGATGCAGCTCTCGGAGTTTTAGAGCTAGAAATAG              |
| Thph-        | 5'-TCCGAGAGCTGCATCAGGTCGAGGGTAAAATCTGATTGTATG          |
| ngU-FsBamHI  | 5'-CGACTCTAGAGGATCCCTTAAGCGGAATGATCTACAAAGCGTTCTTC     |
| NGgR-RBamHI  | 5'-AATCACTAGGGGATCCATTCCATCCACTCCAAGCTCTTG             |
| C mfa2 PstIF | 5'-CTAAGCTTGCATGCCTGCAGGCTAGCCATTGGGCACACCAG           |
| new mfa2F    | 5'-GAAACTGTTGCTGCCTGTGTGCAAGCCATTGTTTCTGTTAACGAGC      |
| new mfa2R    | 5'-TTGCACACAGGCAGCAACAGTTTTCGAAGATGAACATGGTGAATTGGTAAA |
| C mfa2 PstIR | 5'-CCTCTAGAGTCGACCTGCAGTTAGGCCACGGTGCAGTAGACTGC        |
| mfa2C1F      | 5'-TGCCTGAATTGCTCCGCTTGTC                              |
| CasR01       | 5'-GGATACCGACCTTCCGCTTCTTC                             |
| mfa2C1R      | 5'-TGGCTCTGTTTCTCACGAGATCACG                           |
| HygR01       | 5'-TGTATGGAGCAGCAGACGCGCTAC                            |
| Gpd F        | 5'-GATTAGATCTTGCTGAT                                   |
| Cmfa2R       | 5'-TTAGGCCACGGTGCAGTAGACTG                             |
| natR01       | 5'-CGGACTCCCGGACGTTTCGTC                               |
| Hph F        | 5'-ATGAAAAAGCCTGAACTCACCGCG                            |
| hph1-F       | 5'-GCAAGACCTGCCTGAAACCG                                |

|           |                                               |
|-----------|-----------------------------------------------|
| hph1-R    | 5'-GGTCAAGACCAATGCGGAGC                       |
| cas9-F    | 5'-ATGGCTCCTAAGAAGAAGCGGAAGG                  |
| cas9-R    | 5'-TTACTTTTTCTTTTTTGCTGGCCG                   |
| Pu6-F     | 5'-GCATGACGTTATTTATGAGGTGGG                   |
| sgRNA-R   | 5'-AAAAAAGCACCGACTCGGTGCC                     |
| U6T 1621- | 5'-GCTACTTCCTGCTGCGGACCGAGGGTAAAATCTGATTGTATG |
| RT 1621+  | 5'-GTCCGCAGCAGGAAGTAGCGTTTTAGAGCTAGAAATAG     |
| U6T 6375- | 5'-CATCGTGCCGCTGCCAGCGAGGGTAAAATCTGATTGTATG   |
| gRT 6375+ | 5'-CTGGGCAGGCGGCACGATGGTTTTAGAGCTAGAAATAG     |
| U6T 5775- | 5'-GCGTCCAAGACCCTGGTCACGAGGGTAAAATCTGATTGTATG |
| gRT 5775+ | 5'-TGACCAGGGTCTTGGACGCGTTTTAGAGCTAGAAATAG     |
| U6T 5019- | 5'-CGCGAGATGCTCGCAGCCACGAGGGTAAAATCTGATTGTATG |
| gRT 5019+ | 5'-TGGCTGCGAGCATCTCGCGTTTTAGAGCTAGAAATAG      |
| U6T 3949- | 5'-GGTCGCTTGAGGGCGGAACGAGGGTAAAATCTGATTGTATG  |
| 1621 F    | 5'-ATGTCGAACGTCAACACATCTAC                    |
| 1621 R    | 5'-TACACGAGGTTTGTCAG                          |
| 3949 F    | 5'-ATGCGAGACCAAGCTACCACGG                     |
| 3949 R    | 5'-CTTGCCCTGCGCCTTGAGAATG                     |
| 5019 F    | 5'-CTCGCCTCTCAAGGATATTTCCGG                   |
| 5019 R    | 5'-TCCACAACCCAGTCTGCAGTGC                     |
| 5775 F    | 5'-TACTGCAGACCATCTGACAGCCAG                   |
| 5775 R    | 5'-TGGAGTCAACACACAGGGTCCC                     |
| 6375 F    | 5'-GGTCGTAGCCCCCTCGTTTCTTG                    |
| 6375 R    | 5'-AATGCCCGTCTCGAACCCTCG                      |

---
